# Supplementary material for: Synthesis and structural, electronic, optical and FET properties of thiophene–pyrrole mixed hexamers end-capped with phenyl and pentafluorophenyl groups
Source: Royal Society of Chemistry journal article supplement (doi:10.1039/c1jm12966j), 2011-01-01
Supplement: c1jm12966j.pdf [file c1jm12966j.pdf]

## Electronic Supplementary Information

### Synthesis and structural, electronic, optical and FET properties of thiophene-pyrrole mixed hexamers end-capped with phenyl and pentafluorophenyl groups

Tohru Nishinaga,<sup>\*a</sup> Toshihiko Miyata,<sup>a</sup> Masahide Koizumi,<sup>a</sup> Masaki Tateno, Masayoshi  
Takase,<sup>a</sup> Masahiko Iyoda,<sup>a</sup> Norihito Kobayashi<sup>b</sup> and Yoshihito Kunugi<sup>\*b</sup>

<sup>a</sup> Department of Chemistry, Graduate School of Science and Engineering, Tokyo Metropolitan University, Hachioji, Tokyo 192-0397, Japan. nishinaga-tohru@tmu.ac.jp; Fax: (+81)42-677-2525.

<sup>b</sup> Department of Applied Chemistry, Faculty of Engineering, Tokai University, Hiratsuka, Kanagawa 259-1292, Japan. ykunugi@keyaki.cc.u-tokai.ac.jp; Fax: (+81)463-58-1211.

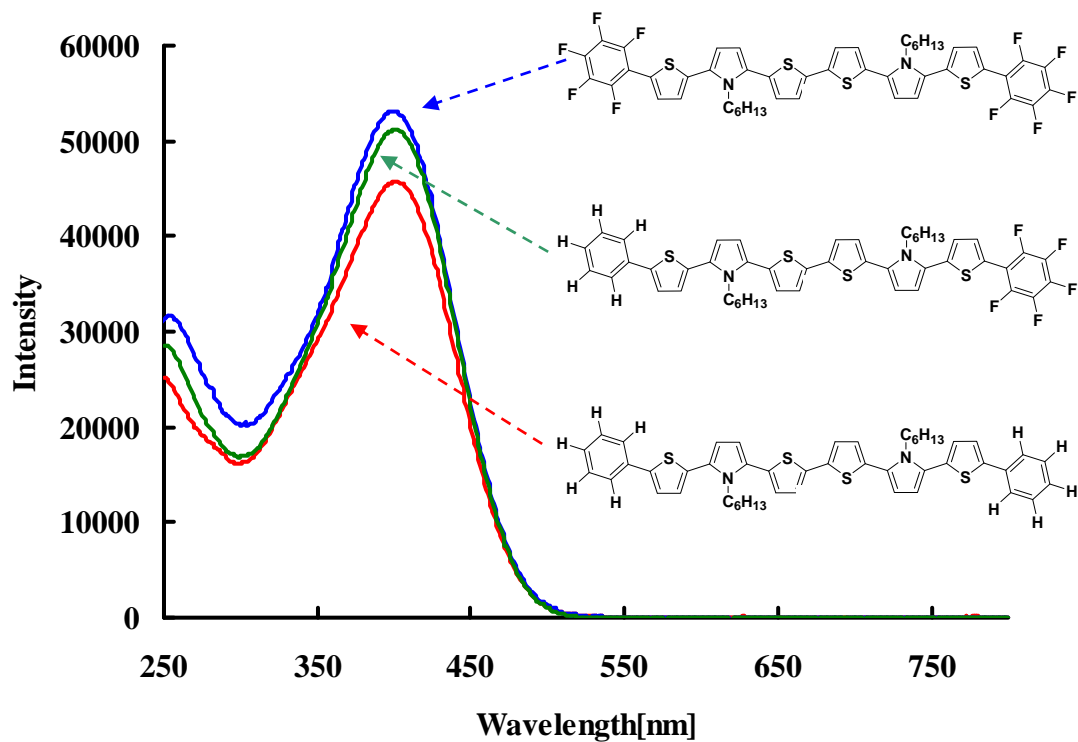

**Figure S1.** UV-vis spectra of 3a–5a.

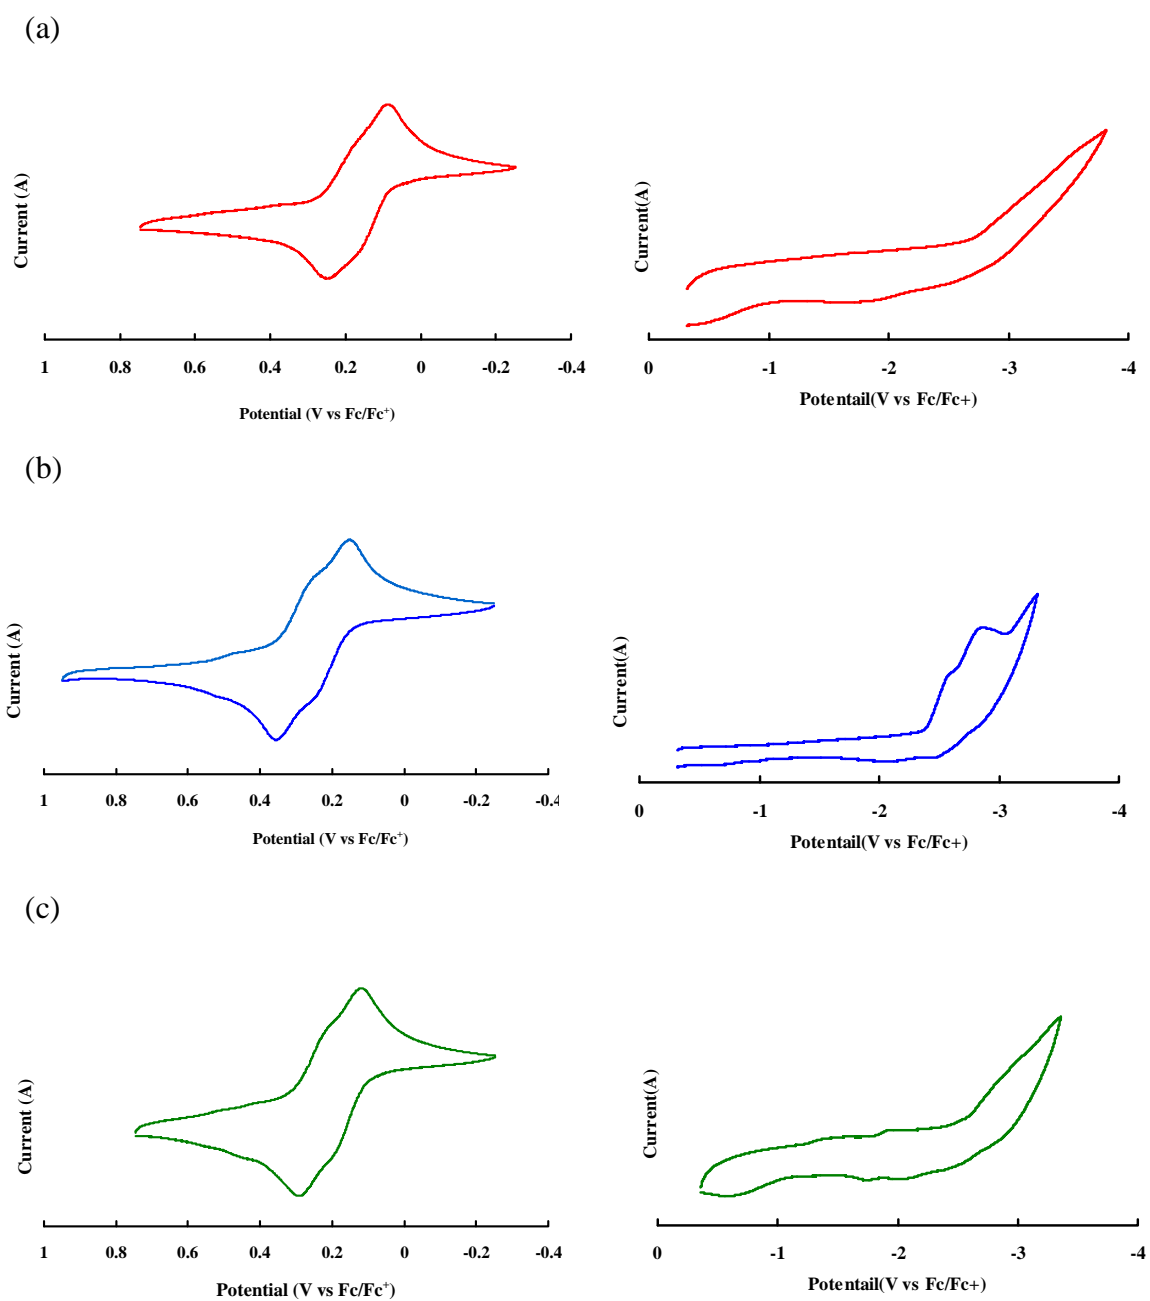

**Figure S2.** Cyclic Voltammograms of (a) **3a**, (b) **4a** and (c) **5a**. Solvents: CH<sub>2</sub>Cl<sub>2</sub> in positive potential regions and THF in negative potential regions; supporting electrolyte: 0.1 M *n*-Bu<sub>4</sub>N PF<sub>6</sub>.

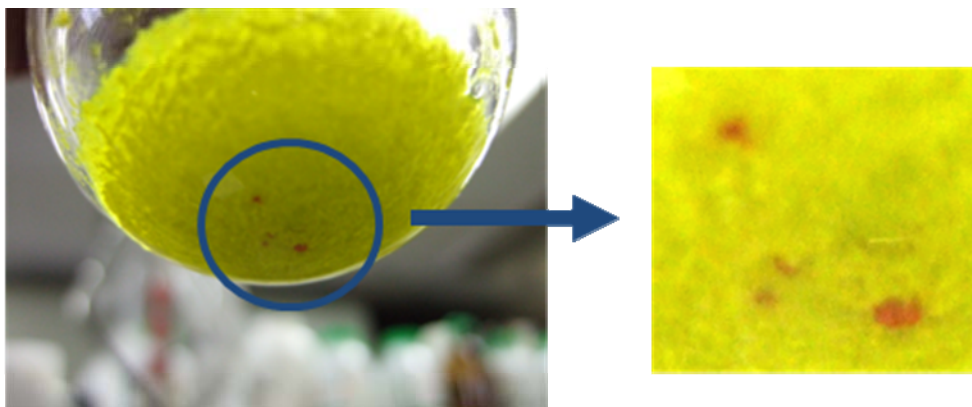

**Figure S3.** Yellow microcrystals and red crystals of **3a** obtained from recrystallization from toluene.

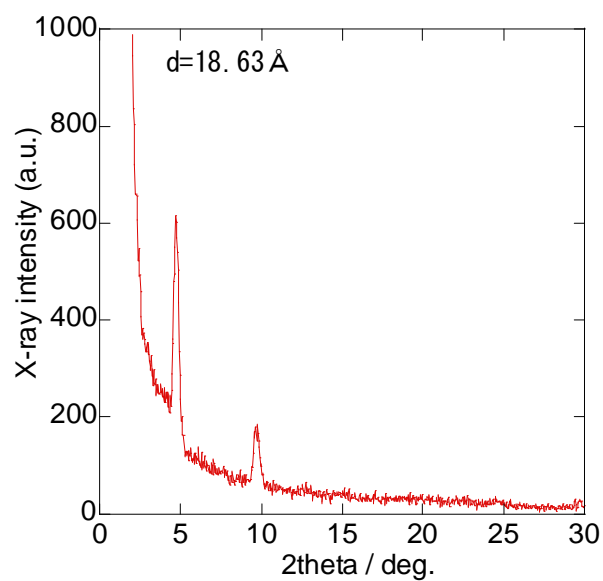

**Figure S4.** XRD of the thin film of **4a**.

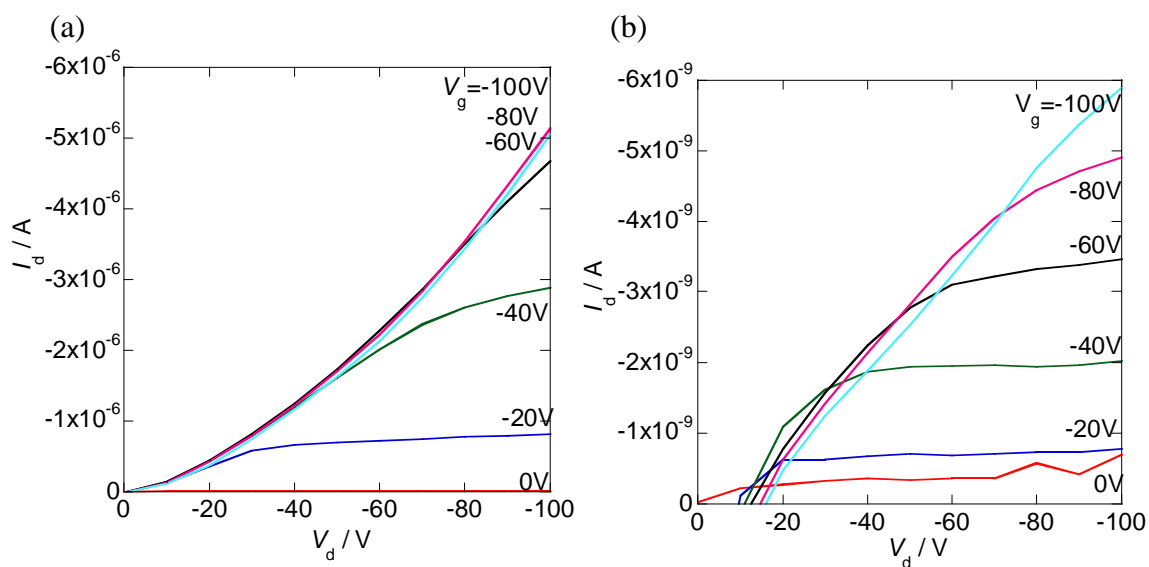

**Figure S5.** Output characteristics of the (a) **4a**- and (b) **5a**-based thin film FET devices.

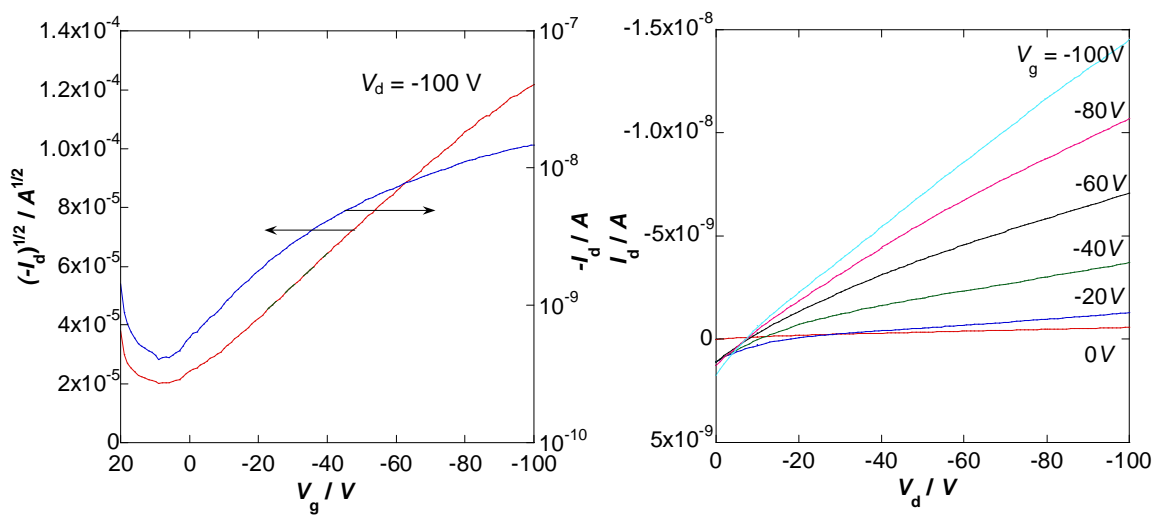

**Figure S6.** Transfer (left) and output (right) characteristics of the **4a**-based single crystal FET device.

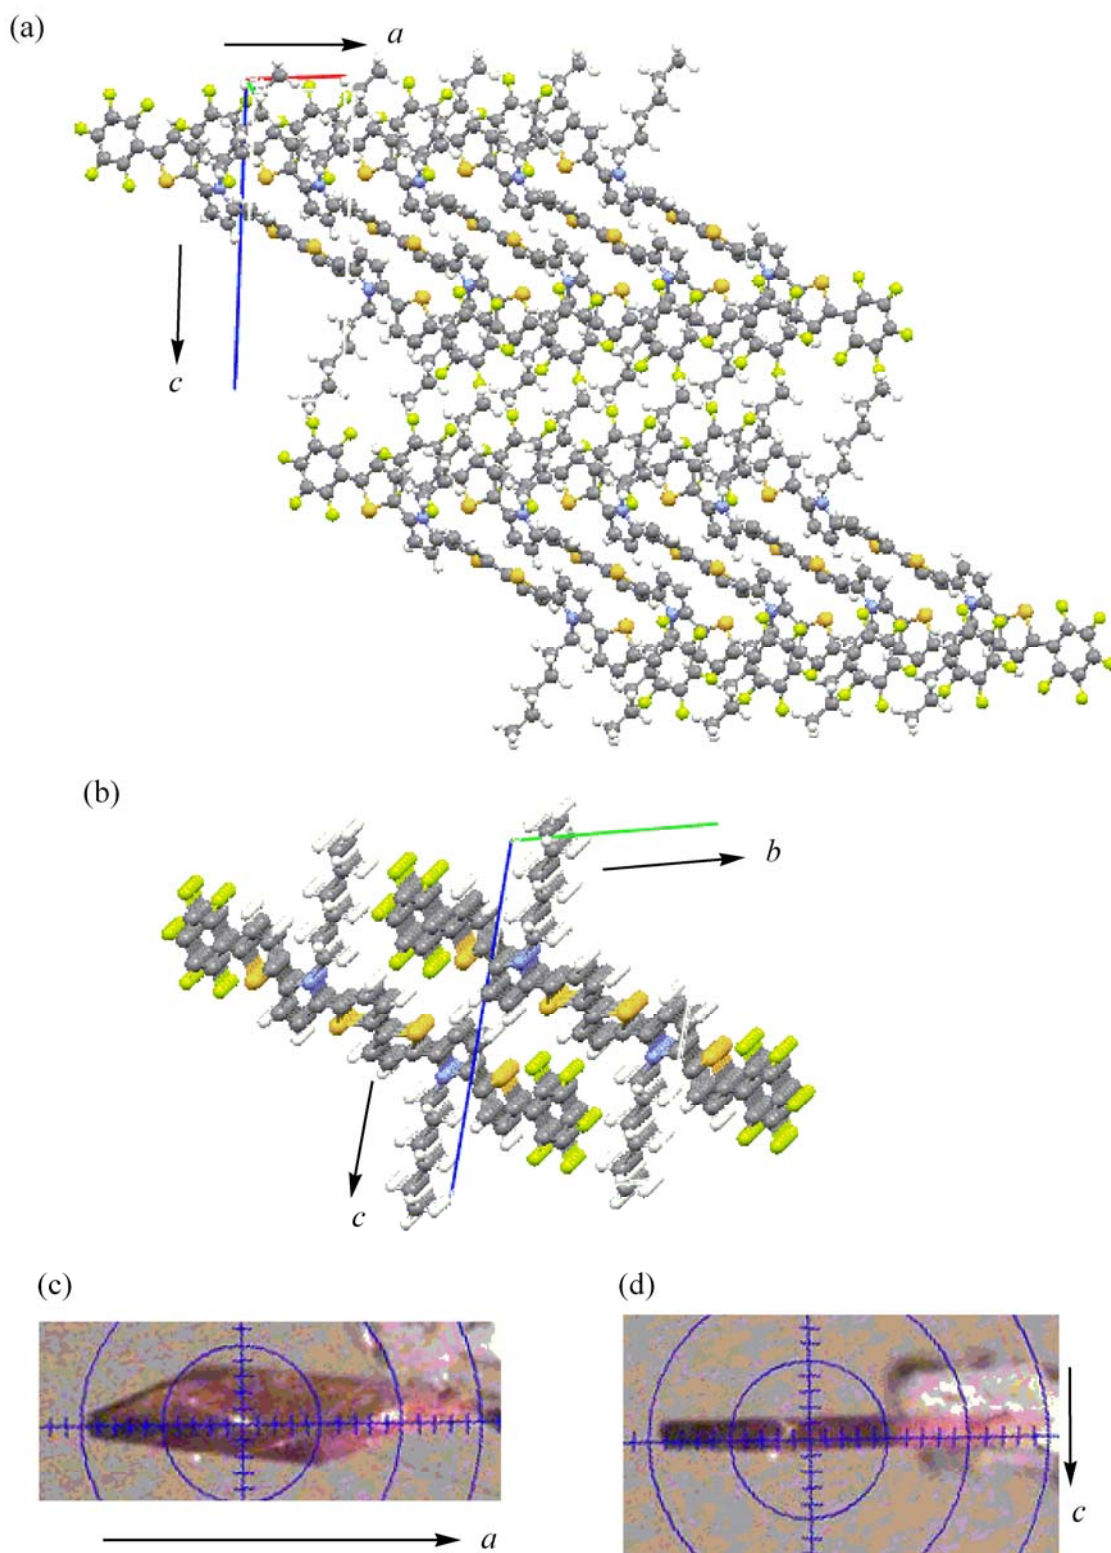

**Figure S7.** Packing structure in (a) *a*-*c* plane and (b) *b*-*c* plane and (c) top and (d) side view of a single crystal of **5a**
